# Supplementary material
Source: PubMed Central journal article supplement (PMC3883136)

**Supplemental Table 1.** Census Tract-Level Variables Used in Computation of the Neighborhood Deprivation Index. Data Downloaded from Summary File 3 of the 2000 US Census

| <b>Analysis Variable<br/>(tract-level)</b> | <b>Census Variable(s)</b>                                | <b>Census Variable<br/>Number(s)</b> |
|--------------------------------------------|----------------------------------------------------------|--------------------------------------|
| Percent with < high school education       | Total population aged 25+                                | P037001                              |
|                                            | Males: no schooling, ..., 12th grade, no diploma         | P037003, ..., P037010                |
|                                            | Females: no schooling, ..., 12th grade, no diploma       | P037020, ..., P037027                |
| Percent males not in the labor force       | Total population, males aged 16+                         | P043002                              |
|                                            | Males aged 16+ not in labor force                        | P043008                              |
| Percent unemployed                         | Total male civilian population aged 16+ in labor force   | P043005                              |
|                                            | Total female civilian population aged 16+ in labor force | P043012                              |
|                                            | Males aged 16+ unemployed                                | P043007                              |
|                                            | Females aged 16+ unemployed                              | P043014                              |
| Percent renter-occupied households         | Total number of occupied housing units                   | H007001                              |
|                                            | Renter occupied housing units                            | H007003                              |
| Percent crowding (>1 person/room)          | Total number of occupied housing units                   | H020001                              |
|                                            | Owner occupied: 1.01, ..., 2.01+ occupants per room      | H020005, ..., H020007                |
|                                            | Renter occupied: 1.01, ..., 2.01+ occupants per room     | H020011, ..., H020013                |
| Percent below poverty level                | Total population for whom poverty status is determined   | P087001                              |
|                                            | Individuals with income below poverty level in 1999      | P087002                              |
| Percent female-headed families             | Total number of family households                        | P010006                              |
|                                            | Female headed family households, children aged <18       | P010015                              |
| Percent income <\$30,000 per year          | Total number of households                               | P052001                              |
|                                            | <\$10,000 per year, ..., \$29,999 per year               | P052002, ..., P052006                |
| Percent on public assistance               | Total number of households                               | P064001                              |
|                                            | Households on public assistance                          | P064002                              |
| Percent no vehicle                         | Total number of occupied housing units                   | H044001                              |
|                                            | Owner-occupied with no vehicle available                 | H044003                              |
|                                            | Renter-occupied with no vehicle available                | H044010                              |
| Percent males in profession                | Total employed civilian males aged 16+                   | P050002                              |
|                                            | Males aged 16+ in professional occupations               | P050010                              |
| Percent females in profession              | Total employed civilian females aged 16+                 | P050049                              |
|                                            | Females aged 16+ in professional occupations             | P050057                              |
| Percent males in management                | Total employed civilian males aged 16+                   | P050002                              |
|                                            | Males aged 16+ in management occupations                 | P050004                              |
| Percent females in management              | Total employed civilian females aged 16+                 | P050049                              |
|                                            | Females aged 16+ in management occupations               | P050051                              |

**Supplemental Table 1, continued.** Census Tract-Level Variables Used in Computation of the Neighborhood Deprivation Index. Data Downloaded from Summary File 3 of the 2000 US Census

| <b>Analysis Variable<br/>(tract-level)</b> | <b>Census Variable(s)</b>                              | <b>Census Variable<br/>Number(s)</b> |
|--------------------------------------------|--------------------------------------------------------|--------------------------------------|
| Median household income                    | Median household income in 1999                        | P053001                              |
|                                            | Total number of households                             | P010001                              |
| Median individual income                   | Median earnings for individuals aged 16+ with earnings | P085001                              |
|                                            | Total number of individuals aged 16+ with earnings     | P084001                              |
| Median value of housing units              | Median value of owner-occupied housing units           | H085001                              |
|                                            | Total number of owner-occupied housing units           | H084001                              |
|                                            | Population aged 5+ in same house since 1995            | PCT021002                            |

**Supplemental Table 2**

Distribution of births to non-Hispanic black women across covariate levels by neighborhood type: New York City 1995-2003

| COVARIATE                    | NEIGHBORHOOD TYPE                  |     |       |                                 |     |       |                                 |     |       |                                 |     |       |
|------------------------------|------------------------------------|-----|-------|---------------------------------|-----|-------|---------------------------------|-----|-------|---------------------------------|-----|-------|
|                              | High Hispanic Density <sup>a</sup> |     |       | High Asian Density <sup>a</sup> |     |       | High White Density <sup>a</sup> |     |       | High Black Density <sup>a</sup> |     |       |
|                              | N                                  | %   | % PTB | N                               | %   | % PTB | N                               | %   | % PTB | N                               | %   | % PTB |
| Age (years)                  |                                    |     |       |                                 |     |       |                                 |     |       |                                 |     |       |
| <20                          | 3,073                              | 12% | 11%   | 2,042                           | 8%  | 9%    | 2,299                           | 9%  | 10%   | 2,408                           | 9%  | 10%   |
| 20-34                        | 18,724                             | 73% | 10%   | 18,461                          | 72% | 10%   | 17,600                          | 69% | 9%    | 18,187                          | 72% | 10%   |
| 35+                          | 3,784                              | 15% | 13%   | 5,047                           | 20% | 12%   | 5,546                           | 22% | 12%   | 4,843                           | 19% | 13%   |
| Maternal education (years)   |                                    |     |       |                                 |     |       |                                 |     |       |                                 |     |       |
| <12, age<20                  | 2,165                              | 9%  | 11%   | 1,319                           | 5%  | 10%   | 1,531                           | 6%  | 10%   | 1,421                           | 6%  | 11%   |
| <12, age>=20                 | 7,000                              | 28% | 11%   | 3,448                           | 14% | 12%   | 2,796                           | 11% | 12%   | 3,111                           | 12% | 12%   |
| 12                           | 8,999                              | 36% | 10%   | 9,266                           | 37% | 10%   | 7,958                           | 32% | 11%   | 9,435                           | 38% | 11%   |
| 13-15                        | 5,151                              | 20% | 10%   | 6,400                           | 25% | 9%    | 6,908                           | 28% | 10%   | 7,423                           | 30% | 10%   |
| 16+                          | 1,863                              | 7%  | 9%    | 4,775                           | 19% | 9%    | 5,900                           | 24% | 8%    | 3,745                           | 15% | 10%   |
| Previous births              |                                    |     |       |                                 |     |       |                                 |     |       |                                 |     |       |
| 1                            | 9,456                              | 37% | 10%   | 11,897                          | 47% | 10%   | 12,230                          | 48% | 10%   | 11,086                          | 44% | 10%   |
| 2-5                          | 15,443                             | 60% | 11%   | 13,429                          | 53% | 10%   | 12,991                          | 51% | 10%   | 14,065                          | 55% | 10%   |
| 6+                           | 677                                | 3%  | 19%   | 223                             | 1%  | 17%   | 223                             | 1%  | 18%   | 287                             | 1%  | 17%   |
| Prepregnancy weight (pounds) |                                    |     |       |                                 |     |       |                                 |     |       |                                 |     |       |
| <125                         | 4,559                              | 20% | 12%   | 5,202                           | 23% | 10%   | 4,849                           | 21% | 11%   | 4,076                           | 17% | 11%   |
| 125-150                      | 8,605                              | 37% | 10%   | 8,746                           | 38% | 10%   | 9,169                           | 39% | 10%   | 8,434                           | 36% | 10%   |
| >150                         | 10,169                             | 44% | 9%    | 9,091                           | 39% | 10%   | 9,215                           | 40% | 9%    | 11,200                          | 47% | 10%   |
| Tobacco use                  |                                    |     |       |                                 |     |       |                                 |     |       |                                 |     |       |
| Nonsmoker                    | 23,334                             | 92% | 10%   | 24,430                          | 96% | 10%   | 24,248                          | 96% | 10%   | 24,296                          | 96% | 10%   |
| Smoker                       | 2,132                              | 8%  | 18%   | 975                             | 4%  | 18%   | 1,046                           | 4%  | 16%   | 982                             | 4%  | 17%   |
| Late or no prenatal care     |                                    |     |       |                                 |     |       |                                 |     |       |                                 |     |       |
| No                           | 16,061                             | 73% | 10%   | 17,691                          | 77% | 9%    | 17,602                          | 78% | 10%   | 17,690                          | 78% | 10%   |
| Yes                          | 6,017                              | 27% | 11%   | 5,236                           | 23% | 10%   | 4,914                           | 22% | 10%   | 5,116                           | 22% | 11%   |

<sup>a</sup>"High density" refers to >90th percentile ethnic density as experienced by black mothers in the birth records. The 90th percentile corresponds to neighborhoods that are >61.9% Hispanic, >8.1% Asian, >23.6% non-Hispanic white, and >88.9% non-Hispanic black. [Women could live in neighborhoods with "high density" of multiple ethnic groups.](#)

**Supplemental Table 2, continued**

Distribution of births to non-Hispanic black women by neighborhood type: New York City 1995-2003

| COVARIATE                | NEIGHBORHOOD TYPE                  |     |       |                                 |     |       |                                 |     |       |                                 |     |       |
|--------------------------|------------------------------------|-----|-------|---------------------------------|-----|-------|---------------------------------|-----|-------|---------------------------------|-----|-------|
|                          | High Hispanic Density <sup>a</sup> |     |       | High Asian Density <sup>a</sup> |     |       | High White Density <sup>a</sup> |     |       | High Black Density <sup>a</sup> |     |       |
|                          | N                                  | %   | % PTB | N                               | %   | % PTB | N                               | %   | % PTB | N                               | %   | % PTB |
| Payment for delivery     |                                    |     |       |                                 |     |       |                                 |     |       |                                 |     |       |
| Private insurance        | 6,444                              | 25% | 9%    | 10,853                          | 43% | 9%    | 12,171                          | 49% | 9%    | 10,043                          | 41% | 10%   |
| Medicaid                 | 17,969                             | 71% | 11%   | 13,387                          | 53% | 10%   | 11,882                          | 47% | 11%   | 13,728                          | 56% | 11%   |
| Self pay                 | 981                                | 4%  | 15%   | 994                             | 4%  | 16%   | 968                             | 4%  | 14%   | 920                             | 4%  | 16%   |
| Nativity                 |                                    |     |       |                                 |     |       |                                 |     |       |                                 |     |       |
| US-born                  | 16,434                             | 65% | 12%   | 11,520                          | 45% | 11%   | 13,933                          | 55% | 11%   | 12,649                          | 50% | 11%   |
| Foreign-born             | 8,912                              | 35% | 8%    | 13,856                          | 55% | 10%   | 11,293                          | 45% | 9%    | 12,688                          | 50% | 10%   |
| Residential stability    |                                    |     |       |                                 |     |       |                                 |     |       |                                 |     |       |
| Less stable              | 12,272                             | 48% | 10%   | 16,089                          | 63% | 10%   | 14,804                          | 58% | 10%   | 1,223                           | 5%  | 11%   |
| More stable              | 13,309                             | 52% | 11%   | 9,461                           | 37% | 11%   | 10,640                          | 42% | 10%   | 24,215                          | 95% | 10%   |
| Neighborhood deprivation |                                    |     |       |                                 |     |       |                                 |     |       |                                 |     |       |
| Richer                   | 453                                | 2%  | 9%    | 18,391                          | 72% | 10%   | 21,632                          | 85% | 10%   | 17,723                          | 70% | 10%   |
| Poorer                   | 25,128                             | 98% | 11%   | 7,159                           | 28% | 11%   | 3,812                           | 15% | 10%   | 7,715                           | 30% | 12%   |

<sup>a</sup>"High density" refers to >90th percentile ethnic density as experienced by black mothers in the birth records. The 90th percentile corresponds to neighborhoods that are >61.9% Hispanic, >8.1% Asian, >23.6% non-Hispanic white, and >88.9% non-Hispanic black. [Women could live in neighborhoods with "high density" of multiple ethnic groups.](#)

### Supplemental Table 3

Fully adjusted preterm birth risk differences per 1,000 births for non-Hispanic black women associated with a change from 10<sup>th</sup> to 90<sup>th</sup> percentiles of Hispanic, Asian, and non-Hispanic black ethnic density: New York City 1995-2003

| ETHNIC DENSITY EXPOSURE | MODEL                                    |              |                                               |               |
|-------------------------|------------------------------------------|--------------|-----------------------------------------------|---------------|
|                         | Fully-adjusted <sup>a</sup> :<br>US-born |              | Fully-adjusted <sup>a</sup> :<br>Foreign-born |               |
|                         | RD <sup>b</sup>                          | (95% CI)     | RD <sup>b</sup>                               | (95% CI)      |
| Hispanic                | 3.8                                      | (-5.3, 12.9) | -17.4                                         | (-27.4, -7.4) |
| Asian                   | -0.3                                     | (-3.6, 3.0)  | 0.5                                           | (-2.7, 3.7)   |
| Non-Hispanic black      | 11.1                                     | (1.0, 21.2)  | -2.4                                          | (-12.9, 8.1)  |

<sup>a</sup>Fully adjusted models included receipt of early prenatal care and pre-pregnancy weight

<sup>b</sup>Fully adjusted risk differences were calculated for women aged 20-34 who were high-school educated, had 2-5 previous live births, weighed between 125 and 150 pounds pre-pregnancy, were nonsmokers, had early prenatal care, were on Medicaid, and resided in a more stable, poorer, and white neighborhood.

**Supplemental Table 4**

Preterm birth risk differences per 1,000 births for non-Hispanic black women associated with a change from 10<sup>th</sup> to 90<sup>th</sup> percentiles of Hispanic, Asian, and non-Hispanic black ethnic density under alternative population and outcome specifications: New York City 1995-2003

| RESTRICTION &<br>ETHNIC DENSITY EXPOSURE | MODEL                |               |                           |               |
|------------------------------------------|----------------------|---------------|---------------------------|---------------|
|                                          | Adjusted:<br>US-born |               | Adjusted:<br>Foreign-born |               |
|                                          | RD <sup>a</sup>      | (95% CI)      | RD <sup>a</sup>           | (95% CI)      |
| <b>Spontaneous PTB Only</b>              |                      |               |                           |               |
| Hispanic                                 | -4.2                 | (-13.2, 4.8)  | -12.1                     | (-20.0,-4.2)  |
| Asian                                    | -1.2                 | (-4.4, 1.9)   | 0.1                       | (-2.3, 2.6)   |
| Non-Hispanic black                       | 2.6                  | (-7.4, 12.6)  | -0.6                      | (-9.1, 7.9)   |
| <b>Primips Only</b>                      |                      |               |                           |               |
| Hispanic                                 | 0.7                  | (-12.3, 13.7) | -12.6                     | (-26.6, 1.5)  |
| Asian                                    | 1.4                  | (-3.4, 6.3)   | 2.9                       | (-0.9, 6.7)   |
| Non-Hispanic black                       | 10.9                 | (-4.1, 26.0)  | 2.6                       | (-12.0, 17.1) |
| <b>Very Preterm</b>                      |                      |               |                           |               |
| Hispanic                                 | 3.1                  | (-1.5, 7.7)   | -5.7                      | (-10.4, -1.1) |
| Asian                                    | -0.6                 | (-2.1, 0.8)   | -1.2                      | (-2.9, 0.4)   |
| Non-Hispanic black                       | 6.2                  | (0.9, 11.5)   | -2.6                      | (-7.5, 2.4)   |

<sup>a</sup> Adjusted risk differences were calculated for women aged 20-34 who were high school educated, were nonsmokers, were on Medicaid, and resided in a more stable, poorer, and white neighborhood. Spontaneous PTB and very preterm risk differences were calculated for women with 2-5 previous live births.

### **Supplemental Figure 1a**

Distribution of births to non-Hispanic black women in relation to non-Hispanic black density<sup>a</sup>: New York City, 1995-2003

<sup>a</sup>Proximity-weighted non-Hispanic black density computed from 2000 US Census data with a 500-meter radius and categorized into 10<sup>th</sup> percentiles based on non-Hispanic black births.

### **Supplemental Figure 1b**

Distribution of births to non-Hispanic black women in relation to Hispanic density<sup>a</sup>: New York City, 1995-2003

<sup>a</sup>Proximity-weighted Hispanic density computed from 2000 US Census data with a 500-meter radius and categorized into 10<sup>th</sup> percentiles based on non-Hispanic black births.

### **Supplemental Figure 1c**

Distribution of births to non-Hispanic black women in relation to Asian density<sup>a</sup>: New York City, 1995-2003

<sup>a</sup>Proximity-weighted Asian density computed from 2000 US Census data with a 500-meter radius and categorized into 10<sup>th</sup> percentiles based on non-Hispanic black births.

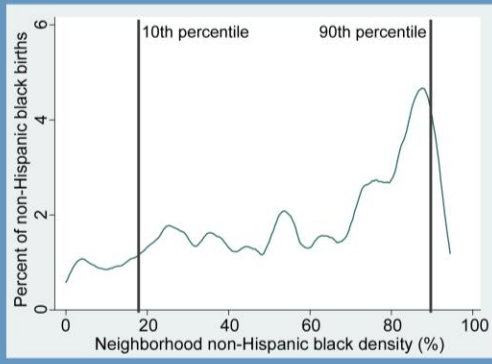

Births to non-Hispanic black women

• 1 Dot = 140

Neighborhood non-Hispanic black density (%).

10th percentiles

0.0 - 17.9  
 18.0 - 28.4  
 28.5 - 41.1  
 41.2 - 53.1  
 53.2 - 64.1  
 64.2 - 73.8  
 73.9 - 80.2  
 80.3 - 85.3  
 85.4 - 88.9  
 89.0 - 100.0

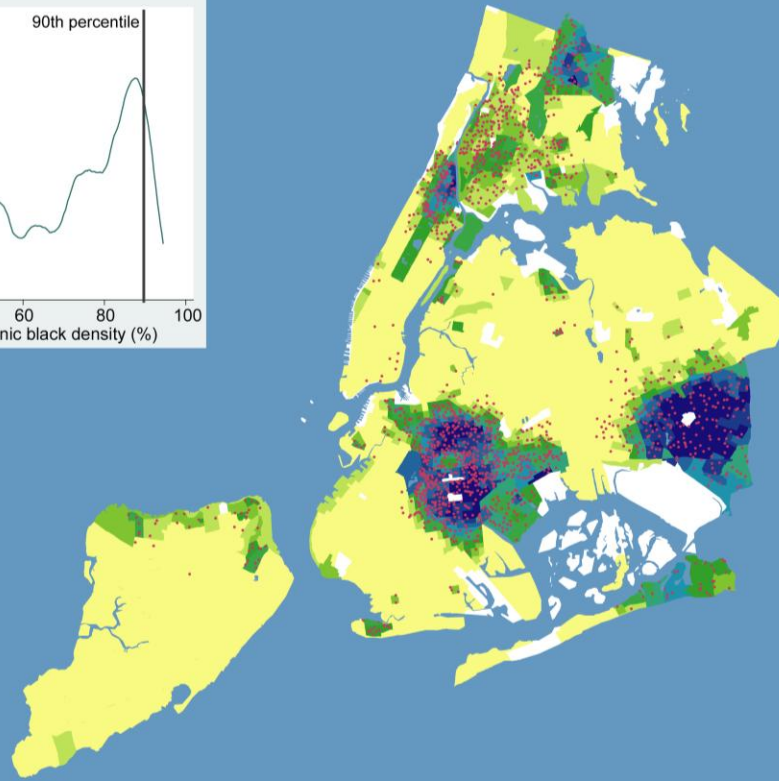



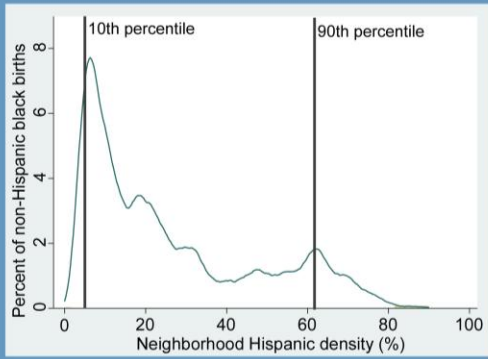

Births to non-Hispanic black women

1 Dot = 140

Neighborhood Hispanic density (%), 10th percentiles

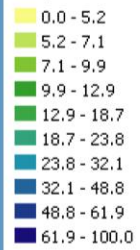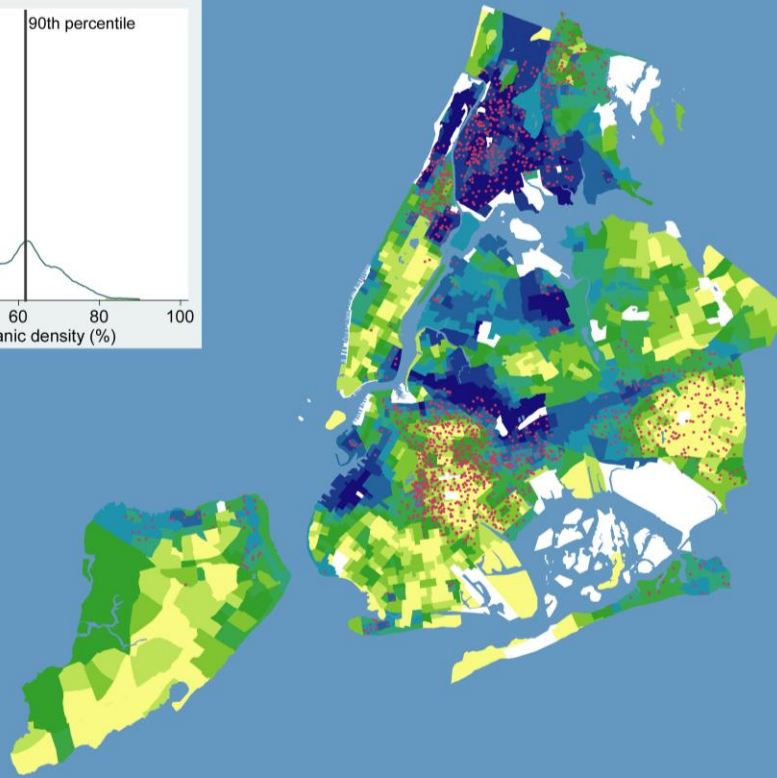

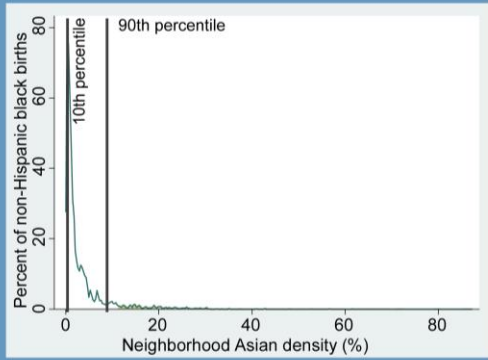

Births to non-Hispanic black women

• 1 Dot = 140

Neighborhood Asian density (%), 10th percentiles

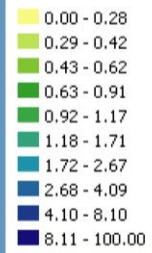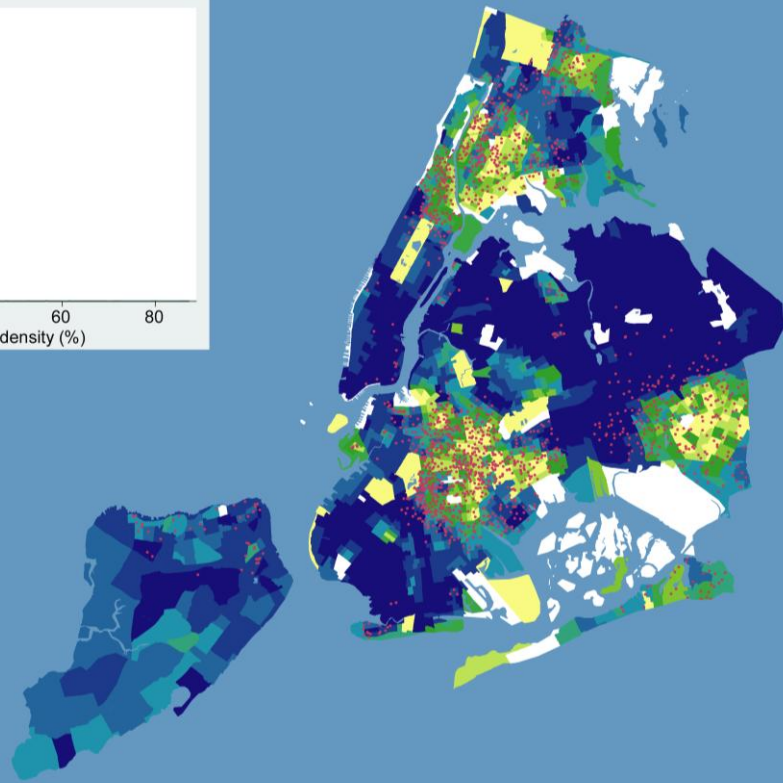

Supplement: NIHMS528165-supplement-01.pdf [file NIHMS528165-supplement-01.pdf]
